# Supplementary material for: Evolution of the epithermal mineralization in the Pukanec deposit, Štiavnické vrchy Mts. (Slovakia)
Source: Research Square preprint supplement (doi:10.21203/rs.3.rs-8701398/v1), 2026-02-17
Supplement: Supplementary file 1 [file 11cd4f5490420ca97f9e3151.xlsx]

## Sheet: Table S2
Table S2: Chemical composition of acanthite
		wt. %							apfu (base 3 atoms)
		Ag	Cu	As	S	Se	Total		Ag	Cu	As	S	Se
1	PPS-1 an15	85.601	0	0.235	13.141	0.043	99.094		1.97123	0	0.00779166	1.01818	0.00135276
2	PR-1522 an1	85.142	0	0.061	14.197	1.015	100.496		1.89975	0	0.00195968	1.06583	0.0309394
3	PR-1522 an2	84.936	0.011	0.037	14.663	1.104	100.835		1.87465	0.000412104	0.0011758	1.0889	0.0332883
4	PR-1522 an3	84.257	0.025	0.27	14.029	0.625	99.28		1.9033	0.000958574	0.00878147	1.06626	0.0192874
5	PR-1495 an7	85.572	0.245	0.078	12.82	0.017	98.857		1.98445	0.00964407	0.00260439	1.00031	0.000538582
6	PR-1495 an9	84.372	0.741	0.541	12.847	0.07	98.684		1.94967	0.0290647	0.0179996	0.998852	0.0022098
7	PBB/4 an12	84.66	0.015	0.225	13.041	0.516	98.571		1.95838	0.000588973	0.00749383	1.015	0.0163065
8	PBB/4 an17	87.44	0	0.068	11.3	0.426	99.339		2.07813	0	0.00232688	0.903603	0.0138314
9	PBB/4 an18	86.885	0.018	0	11.522	0.366	98.869		2.06461	0.000726025	0	0.921211	0.0118814
10	PV-4 an1	85.985	0.003	0.062	13.585	0.024	99.772		1.95545	0.000115806	0.0020301	1.03949	0.000745638
11	PV-4 an2	85.033	0.002	0.096	13.919	0	99.166		1.93103	7.70934e-05	0.00313889	1.06352	0
12	PV-4 an3	86.455	0	0.245	13.191	0.049	100.041		1.97472	0	0.00805719	1.01375	0.00152899
13	LID-1 an12	84.653	1.489	0.086	14.684	0.48	101.543		1.84706	0.0551465	0.00270171	1.078	0.0143078
14	LID-1 an13	82.884	2.68	0	13.554	0	99.243		1.86756	0.1025	0	1.02756	0
15	PM/2 an3	85.046	0.906	0.065	13.057	1.464	100.656		1.92253	0.0347643	0.00211561	0.993118	0.0452121
16	PM/2 an3	85.046	0.906	0.065	13.057	1.464	100.656		1.92253	0.0347643	0.00211561	0.993118	0.0452121
17	PM/2 an10	85.794	0.952	0.016	12.831	2.084	101.793		1.92724	0.0362995	0.000517489	0.969787	0.0639543
18	PM/2 an12	84.206	1.146	0.102	13.064	2.267	100.872		1.89335	0.0437378	0.0033021	0.988326	0.0696357
19	PM/2 an15	83.331	1.071	0.164	13.549	1.655	99.869		1.87518	0.0409082	0.00531352	1.02584	0.0508777
20	PM/2 an20	85.417	0.994	0	13.012	1.417	100.974		1.92766	0.0380765	0	0.988023	0.0436867
21	PM/2 an23	85.986	0.91	0.06	12.254	1.408	100.758		1.97081	0.0354034	0.00198003	0.945002	0.0440874
22	PM/2 an25	80.452	2.089	0	14.737	1.607	99.037		1.7759	0.0782718	0	1.09453	0.0484609
23	PM/2 an26	83.043	2.498	0.129	11.199	0.801	98.593		1.96128	0.100141	0.0043866	0.889923	0.0258441
24	PM-5 an2	83.708	1.184	0.067	13.967	2.266	101.309		1.84647	0.0443314	0.0021279	1.03661	0.0682854
25	PM-5 an3	82.405	1.452	0.114	14.21	1.791	100.048		1.8264	0.0546255	0.0036379	1.05968	0.0542291
26	PM-5 an4	81.073	2.302	0	14.451	1.721	99.592		1.78848	0.0861983	0	1.07261	0.051866
27	PM-5 an6	80.921	2.081	0.077	14.127	1.371	98.664		1.81109	0.079056	0.00248126	1.06381	0.0419188
28	PM-5 an10	80.665	1.795	0	14.851	2.084	99.456		1.77184	0.066925	0	1.09757	0.062536
29	PM-5 an11	81.809	1.827	0.118	14.338	1.726	99.908		1.80785	0.0685307	0.00375445	1.06607	0.052107
30	PM-5 an12	81.472	2.376	0.079	14.442	1.757	100.239		1.78789	0.0885041	0.0024961	1.06634	0.0526741
31	PM-5 an13	82.366	1.707	0.106	13.823	1.431	99.513		1.84473	0.0648939	0.00341817	1.04166	0.0437843
32	PM-5 an16	82.818	1.602	0.12	12.763	1.432	99.527		1.89257	0.0621405	0.00394831	0.981335	0.0447058
33	PM-5 an17	83.117	1.577	0	13.555	2.262	100.628		1.85266	0.0596656	0	1.01658	0.06888
34	PM-5 an21	78.421	1.405	0	14.365	1.177	95.449		1.79844	0.0546921	0	1.10842	0.0368751
35	PM-5 an22	83.326	1.816	0.157	13.625	1.41	100.416		1.85894	0.068768	0.00504299	1.02273	0.0429733
36	PM-5 an23	84.653	0.915	0.176	12.182	2.517	101.246		1.9303	0.035415	0.00577826	0.934625	0.0784076
37	PM-5 an25	83.529	1.032	0.119	13.792	1.791	101.027		1.85689	0.0389417	0.0038089	1.03161	0.0543925
38	PM-5 an30	82.915	1.607	0.066	13.914	1.435	100.007		1.84841	0.0608086	0.00211841	1.04365	0.0437028
39	PM-5 an31	81.982	1.717	0.143	14.88	2.452	101.302		1.77417	0.0630713	0.0044557	1.08347	0.0724921
40	PM-5 an32	82.05	2.04	0.069	14.341	1.827	100.377		1.80459	0.0761578	0.002185	1.06125	0.0548948
41	PM-5 an34	83.268	1.98	0.103	13.908	1.805	101.191		1.83483	0.0740573	0.00326782	1.03114	0.0543361
42	PM-5 an35	81.933	2.668	0.077	13.856	2.134	100.748		1.80501	0.0997682	0.00244239	1.02706	0.0642258
43	PM-5 an38	83.579	1.454	0.054	12.585	2.596	100.367		1.8981	0.0560495	0.00176571	0.96164	0.0805417
44	PM-5 an41	83.218	1.651	0.143	12.675	2.491	100.293		1.88599	0.0635116	0.00466616	0.96651	0.0771238
45	PM-5 an43	82.688	2.035	0	14.078	1.51	101.048		1.82138	0.0760866	0	1.04337	0.0454391
46	PM-5 an44	82.811	1.642	0.06	14.61	1.793	100.984		1.80878	0.0608772	0.00188691	1.0737	0.0535021
47	PM-5 an45	80.773	1.926	0.087	15.194	2.226	100.985		1.74344	0.0705637	0.00270372	1.10344	0.0656385
48	PM-5 an47	83.84	1.914	0.054	13.426	1.939	101.271		1.86212	0.0721578	0.00172684	1.00332	0.0588339
49	PM-5 an49	82.133	1.653	0.089	14.529	1.703	100.203		1.80698	0.0617297	0.00281922	1.0755	0.0511852
50	PM-5 an50	80.372	2.504	0.192	14.439	1.822	99.447		1.77201	0.0937087	0.00609487	1.07111	0.0548785
51	PM-5 an55	83.227	1.307	0.083	13.069	2.128	99.91		1.88402	0.0502206	0.00270522	0.995407	0.0658092
52	PM-5 an56	85.199	0.961	0.031	12.483	2.014	101.316		1.93403	0.0370286	0.0010132	0.953421	0.0624571
53	PM-5 an57	85.801	1.172	0.074	12.866	1.399	101.451		1.93224	0.0448003	0.0023994	0.974875	0.0430407
54	PM-5 an59	80.435	2.747	0.199	15.842	1.745	101.049		1.7097	0.09911	0.00609018	1.13298	0.0506714
55	PM-5 an65	81.969	2.001	0.1	13.412	2.138	99.686		1.84045	0.0762617	0.00323279	1.01322	0.0655806
56	PM-5 an67	85.053	1.097	0.074	12.805	1.452	100.544		1.93094	0.0422737	0.00241887	0.978127	0.0450338
57	PM-5 an69	83.019	1.332	0.131	13.099	2.713	100.406		1.86779	0.0508676	0.00424352	0.991578	0.0833863
58	PM-5 an71	82.916	1.466	0.042	13.411	1.503	99.461		1.87388	0.0562369	0.00136664	1.01977	0.046404
59	PM-5 an73	82.347	1.715	0.061	13.865	1.754	99.903		1.83634	0.0649165	0.00195857	1.04031	0.0534354
60	PM-5 an74	81.639	2.294	0.02	14.721	2.306	101.061		1.77077	0.0844584	0.000624593	1.07433	0.0683309
61	PM-5 an78	83.523	1.299	0.214	13.812	1.82	100.778		1.85486	0.0489666	0.00684262	1.03205	0.0552167
62	PM-5 an79	83.044	1.946	0.11	13.36	1.603	100.279		1.86156	0.0740453	0.0035503	1.00766	0.0490904
63	PM-5 an80	82.63	1.513	0.168	13.4	2.222	100.147		1.85349	0.0576071	0.0054258	1.01133	0.0680909
64	PM-5 an82	84.097	1.527	0.117	13.212	1.665	100.744		1.88711	0.0581621	0.00378011	0.99752	0.0510415
65	PM-5 an83	83.484	1.906	0.056	13.487	1.458	101.126		1.85807	0.0720055	0.00179452	1.00997	0.0443311
66	PM-5 an84	84.773	0.811	0.116	12.908	1.523	100.92		1.91946	0.0311694	0.00378167	0.983373	0.0471103
67	PM-5 an85	82.028	1.317	0.051	15.182	0.936	99.581		1.79946	0.0490402	0.00161085	1.12059	0.0280511
68	PM-5 an88	80.934	1.408	0.107	14.34	1.01	98.497		1.81607	0.0536276	0.0034569	1.08265	0.030961
69	PM-5 an91	84.657	0.885	0.091	12.765	2.6	101.068		1.9117	0.0339223	0.0029587	0.969873	0.0802091
70	PM-5 an92	82.286	1.321	0.112	13.219	3.007	100.03		1.85125	0.0504461	0.00362795	1.00064	0.0924202
71	PM-5 an93	82.988	1.838	0.153	12.798	2.25	100.102		1.87861	0.0706238	0.00498672	0.974765	0.069582
72	PM-5 an94	82.993	1.893	0.082	13.545	1.894	101.162		1.8426	0.0713387	0.00262124	1.01182	0.0574464
73	PM-5 an95	82.884	1.719	0.094	13.085	2.114	99.991		1.87052	0.0658497	0.00305438	0.993582	0.0651765
74	PM-5 an100	85.747	0.714	0.098	12.784	1.723	101.183		1.94047	0.0274266	0.00319314	0.973402	0.0532681
75	PM-5 an101	85.538	0.736	0.069	12.791	2.26	101.487		1.92813	0.0281605	0.00223939	0.970104	0.0695951
76	PM-5 an105	84.626	1.502	0.057	12.676	2.222	101.183		1.90846	0.0574956	0.00185079	0.961831	0.0684568
77	PM-5 an108	85.532	1.049	0.098	12.319	2.122	101.214		1.94566	0.0405042	0.00320973	0.94287	0.0659444
78	PM-5 an116	84.787	1.372	0.164	12.2	2.272	100.908		1.93284	0.0530891	0.00538286	0.935757	0.0707567
79	PM-5 an156	81.791	1.614	0	14.44	2.138	100.078		1.80266	0.0603806	0	1.07081	0.064374
80	PM-5 an157	81.211	1.442	0.08	14.432	2.986	100.211		1.78535	0.0538096	0.00253222	1.06751	0.0896793
81	PM-5 an1	85.287	0.717	0.092	12.011	3.02	101.254		1.9494	0.0278178	0.00302768	0.923709	0.0943017
82	PM-5 an2	83.657	1.227	0.081	11.897	3.684	101.387		1.90736	0.0474855	0.002659	0.912653	0.114748
83	PM-5 an4	83.534	1.007	0.072	12.481	3.268	100.453		1.9005	0.0388883	0.00235852	0.955412	0.101573
84	PM-5 an5	83.375	1.304	0.089	12.692	3.246	100.799		1.88158	0.0499516	0.00289188	0.963727	0.100076
85	PM-5 an3	83.426	1.466	0.187	13.246	3.312	101.764		1.84883	0.0551462	0.00596679	0.987684	0.100272

## Sheet: Table S3
Table S3: Chemical composition of Au-Ag alloys
		wt. %								apfu (base 1 atom)
		Ag	Au	Hg	Bi	S	Te	Total		Ag	Au	Hg	Bi	S	Te
1	PPS-1 an1	31.903	67.024	0.983	0.021	0	0.099	100.03		0.460815	0.530184	0.00763555	0.000156571	0	0.00120887
2	PPS-1 an2	33.663	65.574	0.322	0.063	0.004	0.088	99.714		0.481809	0.51399	0.00247839	0.000465435	0.000192628	0.00106477
3	PPS-1 an3	36.312	63.116	0.768	0.117	0.024	0.103	100.44		0.5245	0.49927	0.00596552	0.000872323	0.00116639	0.00125772
4	PPS-1 an4	37.387	61.527	0.912	0.041	0.041	0.154	100.159		0.518979	0.46773	0.00680794	0.000293771	0.00191492	0.00180717
5	PPS-1 an5	37.141	62.442	0.524	0.159	0.009	0.442	100.772		0.514339	0.473558	0.00390228	0.00113655	0.000419349	0.00517449
6	PPS-1 an6	37.433	61.927	0.413	0.069	0.042	0.09	100.03		0.520406	0.471485	0.00308766	0.000495145	0.0019646	0.00105774
7	PPS-1 an7	36.555	62.635	0.309	0.021	0.046	0.048	99.666		0.512494	0.480905	0.00232965	0.00015197	0.00216988	0.000568896
8	PPS-1 an8	36.843	62.468	0.349	0.376	0	0.444	100.556		0.512012	0.475426	0.00260821	0.00269717	0	0.00521625
9	PPS-1 an9	31.242	67.642	0.355	0.321	0.028	0.395	100.004		0.452319	0.536319	0.00276392	0.00239887	0.00136396	0.00483452
10	PPS-1 an10	37.036	61.53	0.669	0.246	0.009	0.422	99.957		0.516589	0.470011	0.00501809	0.00177114	0.000422377	0.00497603
11	PPS-1 an11	37.428	62.21	0.128	0.185	0.02	0.424	100.428		0.518885	0.472319	0.00095428	0.00132386	0.000932914	0.00496924
12	PPS-1 an12	36.775	62.694	0.363	0.151	0.049	0.144	100.188		0.512957	0.478912	0.00272287	0.00108718	0.00229965	0.00169801
13	PPS-1 an13	32.247	66.535	0.005	0	0.025	0.396	102.219		0.466486	0.527108	3.88965e-05	0	0.00121682	0.00484278
14	PPS-1 an14	35.259	63.646	0.689	0.152	0.035	0.137	99.957		0.497649	0.491954	0.00522954	0.00110737	0.0016621	0.00163465
15	LID-1 an5	44.491	53.387	0.147	0.086	0	0.508	98.744		0.597014	0.392327	0.00106077	0.000595671	0	0.0057627
16	LID-1 an9	43.056	56.318	0.058	0	0	0.528	99.96		0.578897	0.414682	0.00041936	0	0	0.00600139
17	LID-1 an24	38.273	61.384	0	0.007	0	0.564	100.25		0.52854	0.464239	0	4.98976e-05	0	0.00658438
18	LID-1 an15	39.01	60.451	0.178	0.246	0.012	0.086	99.99		0.538342	0.456864	0.00132097	0.00175232	0.000557187	0.0010033
19	LID-1 an16	41.465	58.405	0.143	0.194	0.003	0.492	100.714		0.559934	0.431922	0.00103844	0.00135224	0.000136306	0.00561656
20	LID-1 an17	42.731	56.557	0.091	0.201	0	0.538	100.118		0.575023	0.416802	0.000658529	0.00139616	0	0.00612033
21	LID-1 an18	47.602	51.108	0.624	0.112	0.028	0.506	99.98		0.622196	0.36584	0.00438609	0.000755641	0.00123139	0.00559116
22	LID-1 an19	46.937	51.972	0.005	0.263	0.024	0.077	99.318		0.619542	0.375686	3.54909e-05	0.00179187	0.00106587	0.000859203
23	LID-1 an20	37.087	61.793	0.853	0.068	0.01	0.458	100.279		0.516227	0.471041	0.00638498	0.000488567	0.000468335	0.00538933
24	LID-1 an21	38.707	61.428	0.004	0	0.017	0.479	100.635		0.531601	0.462023	2.95425e-05	0	0.000785565	0.00556137
25	LID-1 an22	28.838	70.617	0.334	0.245	0	0.212	100.246		0.42411	0.568753	0.00264151	0.00185984	0	0.00263572
26	LID-1 an23	28.148	71.439	0.576	0	0	0.047	100.21		0.416262	0.578569	0.00458072	0	0	0.000587581
27	LID-1 an24	41.884	57.336	0	0.12	0	0.502	99.872		0.567318	0.42531	0	0.000838987	0	0.0057482
28	LID-1 an25	37.058	61.734	0.024	0.192	0	0.076	99.084		0.52163	0.475889	0.00018167	0.00139501	0	0.000904366
29	LID-1 an26	45.407	53.516	0.394	0.106	0	0.115	99.538		0.604792	0.390362	0.00282209	0.000728761	0	0.00129489
30	LID-1 an27	43.984	55.288	0.02	0.139	0.018	0.566	100.015		0.587363	0.404337	0.000143626	0.000958126	0.000808763	0.00638967
31	LID-1 an28	42.41	56.309	0.505	0	0.029	0.595	99.854		0.572094	0.415985	0.00366338	0	0.00131624	0.00678525
32	LID-1 an29	36.428	63.116	0.631	0.164	0.031	0.413	100.783		0.506855	0.480937	0.00472138	0.00117784	0.00145127	0.0048579
33	LID-1 an30	36.152	63.587	0.428	0.327	0	0.385	100.889		0.504215	0.485682	0.0032101	0.00235411	0	0.00453935
34	LID-1 an31	44.938	54.346	0.229	0.224	0	0.566	100.307		0.595794	0.394594	0.00163271	0.00153294	0	0.00634379
35	LID-1 an32	11.125	89.62	0.017	0.119	0	0	100.918		0.18435	0.813296	0.00015149	0.00101786	0	0
36	LID-1 an33	4.332	96.057	0.637	0.37	0.011	0	101.433		0.0753288	0.91475	0.00595667	0.00332101	0.00064358	0
37	LID-1 an34	33.284	66.206	0.076	0.124	0	0.409	100.125		0.475277	0.517737	0.000583601	0.000913963	0	0.00493724
38	PV-3A an1	3.502	96.161	0.115	0.076	0.013	0.043	99.91		0.0621523	0.934632	0.00109757	0.000696227	0.000776286	0.000645149
39	PV-3A an2	3.554	95.967	0.351	0.113	0	0	99.985		0.0630621	0.932554	0.00334927	0.00103497	0	0
40	PV-3A an3	32.596	65.77	0.115	0.151	0.014	0.045	98.71		0.47344	0.523153	0.000898234	0.00113207	0.000684172	0.000552539
41	PV-3A an4	3.113	97.426	0.484	0.136	0.006	0.017	101.199		0.0547428	0.938261	0.00457704	0.00123448	0.000355007	0.000252724
42	PV-3A an5	3.343	96.584	0.657	0.294	0	0.094	100.972		0.0588334	0.930879	0.00621791	0.00267074	0	0.00139851
43	PV-3A an6	3.356	96.602	0.487	0.114	0.022	0.033	100.638		0.0591587	0.932574	0.00461654	0.00103728	0.00130484	0.000491768
44	PV-3A an7	0.781	99.719	0.056	0.449	0	0	101.013		0.0140332	0.981261	0.00054111	0.00416436	0	0
45	PV-3A an8	7.202	91.138	0.062	0.202	0.038	0.042	98.684		0.125439	0.869319	0.000580714	0.00181604	0.0022269	0.000618413
46	PV-3A an9	37.127	61.28	0.784	0.014	0.026	0.454	99.685		0.518628	0.468798	0.00588944	0.000100946	0.00122202	0.00536133
47	PV-3A an11	11.014	86.375	0.568	0.281	0	0	98.266		0.187244	0.804178	0.00519282	0.00246584	0	0
48	PV-3A an13	0.971	99.167	0.153	0.137	0.037	0.003	100.482		0.0174768	0.977483	0.0014809	0.00127279	0.00224068	4.56471e-05
49	PV-3A an14	37.486	61.456	0.649	0	0.041	0.442	100.102		0.520521	0.467341	0.00484624	0	0.00191554	0.00518849
50	PV-3A an15	33.458	65.47	0.764	0.297	0	0.369	100.38		0.476688	0.51083	0.00585354	0.00218417	0	0.00444437
51	PV-1a an2	36.718	60.548	0.042	0.007	0.657	0.083	99.033		0.495702	0.447653	0.000304917	4.87793e-05	0.0298431	0.000947261
52	PV-1a an3	34.447	63.507	0	0.176	0.814	0.072	100.299		0.461787	0.466243	0	0.00121787	0.0367157	0.000815968
53	PV-1a an4	32.816	66.587	0	0.014	0.146	0.044	100.802		0.454982	0.505591	0	0.000100192	0.00681081	0.000515717
54	PV-1A	50.81	49.67	0	0	0.02	0.06	100.58		0.650008	0.347988	0	0	0.000860868	0.00064889
55	PV-1A	50.36	50.82	0	0	0.04	0.06	101.28		0.642538	0.355098	0	0	0.00171716	0.000647164
56	PV-1A	50.73	49.82	0	0	0.08	0.07	100.7		0.647544	0.348264	0	0	0.00343583	0.000755358
57	PV-1A	51.58	49.64	0	0	0.02	0.09	101.33		0.653668	0.344515	0	0	0.000852792	0.000964203
58	PV-1A	54.7	46.18	0	0	0.01	0.05	100.95		0.68302	0.315791	0	0	0.000420129	0.000527796
59	PV-1A	53.49	47	0.04	0	0.05	0.07	100.67		0.672687	0.323697	0.000270515	0	0.00211567	0.000744198
60	PV-1A	55.08	46.39	0	0	0.04	0.08	101.59		0.682633	0.314861	0	0	0.00166798	0.000838173
61	PV-1A	50.8	50.42	0	0	0.01	0.07	101.3		0.647091	0.351727	0	0	0.000428587	0.000753789
62	PV-1A	49.5	51.07	0	0	0.03	0.04	100.64		0.637861	0.360402	0	0	0.00130071	0.000435744
63	PV-1A	48.87	52.04	0	0	0.03	0.07	101.01		0.630339	0.367595	0	0	0.00130194	0.000763273
64	PV-1A	45.78	53.76	0	0	0.04	0.03	99.62		0.607156	0.390467	0	0	0.00178493	0.000336353
65	PV-1A	54.75	46.44	0.02	0	0.06	0.08	101.35		0.680437	0.31608	0.000133667	0	0.00250895	0.000840512
66	PV-1A	52.33	48.57	0	0	0.04	0.08	101.02		0.661305	0.33614	0	0	0.00170078	0.000854655
67	PV-1A	51.75	49.43	0	0	0.06	0.08	101.32		0.65432	0.342272	0	0	0.00255252	0.000855106
68	PV-1A	51.81	48.92	0	0	0.03	0.06	100.82		0.657883	0.340191	0	0	0.00128172	0.000644075
69	PV-1A	54.89	46.02	0	0	0.03	0.09	101.03		0.683819	0.313975	0	0	0.0012575	0.000947852
70	PV-1A	51.32	50.12	0	0	0.04	0.04	101.52		0.650143	0.347723	0	0	0.00170498	0.000428383
71	PV-1A	47.47	52.18	0	0	0.04	0.06	99.76		0.622551	0.374766	0	0	0.00176503	0.000665207
72	PV-1A	45.03	55.98	0	0	0.03	0.06	101.11		0.593607	0.404139	0	0	0.00133062	0.000668649
73	PV-1A	48.33	52.69	0	0	0.05	0.02	101.09		0.624655	0.372952	0	0	0.00217436	0.000218526
74	PV-1A	48.03	52.47	0	0	0.04	0.03	100.57		0.624375	0.373546	0	0	0.00174956	0.000329689
75	PV-1A	56.07	44.41	0	0	0.05	0.07	100.62		0.695166	0.301536	0	0	0.00208576	0.000733679
76	PV-1A	44.4	56.23	0	0	0.02	0.06	100.71		0.589546	0.408887	0	0	0.000893515	0.000673497
77	PV-1A	46.74	55.59	0	0	0.01	0.03	102.38		0.604954	0.394032	0	0	0.000435483	0.00032825
78	PV-1A	43.79	55.28	0	0	0.09	0.06	99.22		0.588437	0.406812	0	0	0.00406916	0.000681595
79	PV-1A	45.85	55.37	0	0	0.01	0.08	101.32		0.600966	0.397453	0	0	0.000441009	0.000886443
80	PV-1A	45.2	56.02	0	0	0.04	0.03	101.3		0.59428	0.403363	0	0	0.0017695	0.000333445
81	PV-1A	41.3	59.45	0	0	0.04	0.03	100.82		0.557976	0.439863	0	0	0.00181829	0.000342639
82	PV-1A	41.44	60.19	0	0	0.04	0.06	101.73		0.555584	0.441932	0	0	0.00180438	0.000680035
83	PV-1A	45.12	56.48	0	0	0.05	0.04	101.69		0.591713	0.405637	0	0	0.00220622	0.000443458
84	PV-1A	45.15	55.75	0	0	0.03	0.06	101		0.595236	0.40251	0	0	0.00133073	0.000668702
85	PV-1A	45.47	55.13	0	0	0.01	0.06	100.67		0.600295	0.398592	0	0	0.000444198	0.000669639
86	PV-1A	46.69	54.73	0	0	0.03	0.06	101.52		0.607676	0.390099	0	0	0.00131373	0.000660161
87	PV-1A	46.67	55.34	0	0	0.01	0.04	102.07		0.605604	0.39327	0	0	0.000436604	0.000438794
88	PDO-1 an1	32.771	66.662	0.92	0.242	0.003	0.395	100.993		0.466545	0.519736	0.00704341	0.00177834	0.000143702	0.00475391
89	PDO-1 an2	35.577	63.407	0.76	0	0.018	0.398	100.179		0.50007	0.488089	0.00574469	0	0.000851277	0.00472927
90	PDO-1 an3	34.313	63.496	0.99	0.007	0.014	0.421	99.241		0.490008	0.496583	0.00760276	5.15987e-05	0.000672682	0.00508249
91	PDO-1 an4	34.209	64.586	0.541	0.035	0.05	0.001	99.441		0.488044	0.504612	0.00415057	0.00025774	0.00240008	1.20606e-05
92	PDO-1 an5	34.518	64.484	0.871	0.249	0.03	0.035	100.187		0.489201	0.500489	0.00663822	0.00182153	0.00143054	0.000419334
93	PDO-1 an6	37.498	61.251	0.667	0	0.038	0.074	99.543		0.523569	0.46836	0.00500822	0	0.0017852	0.000873469
94	PDO-1 an7	37.348	61.567	0.104	0.041	0.042	0.503	99.605		0.52083	0.470194	0.000779926	0.000295127	0.00197068	0.00592989
95	PDO-1 an8	37.883	61.17	0.849	0	0.008	0.07	100.005		0.5267	0.465755	0.00634772	0	0.000374236	0.000822748
96	PDO-1 an9	34.891	63.888	0.988	0.288	0.031	0.463	100.555		0.490964	0.49233	0.00747626	0.00209182	0.00146769	0.00550766
97	PDO-1 an10	37.57	61.419	0.737	0.102	0.048	0.403	100.303		0.520335	0.465849	0.0054891	0.000729186	0.00223677	0.00471843
98	PDO-1 an11	35.629	62.681	0.534	0.35	0.038	0.416	99.738		0.501272	0.482954	0.00404019	0.00254175	0.00179883	0.00494781
99	PDO-1 an12	38.338	60.9	0.408	0	0.044	0.414	100.149		0.528984	0.460184	0.00302737	0	0.00204269	0.00482907
100	PDO-1 an13	36.983	61.082	0.345	0.292	0.04	0.45	99.237		0.518351	0.468852	0.00260035	0.00211252	0.00188634	0.00533193
101	PK-1 an1	57.399	28.707	0.32	0.03	10.772	0.131	98.232		0.51549	0.14119	0.00154546	0.00013907	0.325499	0.000994573
102	PK-1 an2	33.496	64.939	0.454	0.117	0.016	0.079	99.266		0.479861	0.509482	0.0034976	0.000865177	0.000771223	0.000956753
103	PK-1 an3	36.179	62.697	0.29	0.259	0.008	0.408	99.886		0.507847	0.481974	0.0021891	0.0018766	0.000377836	0.00484157
104	PK-1 an4	40.407	58.457	0.905	0.007	0	0.512	100.335		0.550287	0.435984	0.00662785	4.9207e-05	0	0.00589458
105	PK-1 an5	42.378	57.109	0.94	0.107	0.038	0.13	100.72		0.569066	0.419979	0.00678799	0.000741655	0.00171689	0.00147576
106	PK-1 an6	41.16	58.012	0.566	0.208	0.024	0.078	100.061		0.559911	0.432177	0.00414049	0.0014605	0.00109848	0.000896991
107	PR-1522 an4	43.461	56.02	0	0.114	0	0.555	100.821		0.572125	0.403864	0	0.000774626	0	0.00617638
108	PR-1522 an5	39.844	58.772	0	0.144	0.042	0.394	99.711		0.541552	0.43747	0	0.00101027	0.00192072	0.00452714
109	PR-1522 an6	38.856	60.236	0.021	0.138	0.057	0.445	100.091		0.531202	0.450981	0.000154387	0.000973815	0.00262188	0.00514294
110	PR-1522 an7	40.652	58.053	0.047	0	0.036	0.06	99.536		0.549571	0.4298	0.000341689	0	0.0016375	0.000685714
111	PR-1522 an8	46.31	53.346	0	0.181	0.046	0.082	100.12		0.608208	0.38369	0	0.00122702	0.0020327	0.000910419
112	PR-1522 an9	42.878	55.731	0	0.068	0.015	0.56	99.543		0.57539	0.409567	0	0.000471012	0.000677261	0.00635281
113	PR-1522 an10	39.401	60.019	0	0.062	0.011	0.448	100.329		0.536306	0.447399	0	0.000435605	0.000503774	0.00515506
114	PR-1522 an11	38.076	60.044	0	0.131	0.024	0.493	99.278		0.52512	0.453501	0	0.000932556	0.00111367	0.00574784
115	PR-1522 an12	38.378	60.488	0	0.056	0.028	0.444	99.499		0.531512	0.458776	0	0.000400327	0.00130475	0.00519833
116	PNB-1 an1	33.779	64.849	0.032	0.055	0.128	0.43	99.306		0.481442	0.506176	0.000245267	0.000404628	0.00613825	0.00518103
117	PNB-1 an2	33.289	65.579	0.069	0	0.052	0.456	99.449		0.476862	0.514467	0.000531536	0	0.0025063	0.00552214
118	PNB-1 an3	32.531	66.434	0.278	0	0.025	0.06	99.355		0.470117	0.525774	0.00216045	0	0.00121559	0.000733009
119	PNB-1 an4	34.678	64.334	0.625	0.138	0.018	0.047	99.868		0.492082	0.499948	0.0047693	0.00101078	0.000859395	0.000563808
120	PNB-1 an5	33.364	64.226	0.734	0.187	0.01	0.417	98.941		0.480648	0.506712	0.00568639	0.00139055	0.000484715	0.0050785
121	PNB-1 an6	34.526	64.726	0.196	0.021	0.023	0.379	99.891		0.489633	0.502694	0.00149476	0.000153723	0.00109746	0.00454374
122	PNB-1 an7	31.161	68.007	0.995	0	0.04	0.362	100.602		0.449132	0.536805	0.00771218	0	0.00193981	0.00441084
123	PNB-1 an8	47.839	50.912	0.074	0.085	0.075	0.108	99.093		0.628236	0.366152	0.000522593	0.000576177	0.0033139	0.00119899
124	PNB-1 an9	43.652	54.909	0.087	0.193	0	0.535	99.391		0.587341	0.404604	0.000629501	0.00134041	0	0.00608541
125	PNB-1 an10	34.027	65.123	0.661	0.227	0.009	0.049	100.103		0.484375	0.507684	0.00506001	0.00166794	0.00043106	0.000589664
126	PNB-1 an11	32.465	65.724	0.917	0.118	0.014	0.407	99.645		0.46777	0.518611	0.00710522	0.000877597	0.000678707	0.00495749
127	PNB-1 an12	46.448	52.551	0.601	0.02	0.063	0.496	100.182		0.609616	0.377721	0.00424185	0.000135493	0.00278206	0.00550328
128	PNB-1 an13	41.356	58.236	0.131	0.351	0.022	0.512	100.611		0.55881	0.430941	0.000951894	0.0024481	0.0010002	0.00584852
129	PNB-1 an14	44.063	55.24	0.299	0	0.033	0.535	100.203		0.586944	0.402974	0.00214183	0	0.00147902	0.00602457
130	PNB-1 an15	45.133	54.204	0.08	0	0.015	0.56	99.992		0.598704	0.393776	0.000570688	0	0.000669493	0.00627994
131	PM/2 an5	35.398	63.649	0	0	0	0.084	99.131		0.50334	0.49565	0	0	0	0.00100975
132	PM/2 an6	36.17	63.203	0.611	0.02	0.053	0.09	100.151		0.506696	0.484884	0.0046029	0.000144619	0.00249811	0.00106584
133	PM/2 an7	35.383	63.394	0.003	0.191	0.027	0.092	99.09		0.502818	0.493361	2.2926e-05	0.00140102	0.00129097	0.00110523
134	PM/2 an32	23.869	75.658	0.035	0.22	0	0.027	99.86		0.364098	0.632032	0.000287107	0.00173222	0	0.000348175
135	PM/2 an33	23.373	75.235	0.439	0.24	0.072	0.053	99.491		0.357523	0.630246	0.00361115	0.00189495	0.00370561	0.000685355
136	PM/2 an34	99.801	0	0.67	0	0.102	0.213	100.837		0.990256	0	0.00357502	0	0.00340526	0.00178666
137	PM/2 an35	34.858	62.631	0	0.218	0	0.39	98.099		0.500806	0.492785	0	0.00161666	0	0.00473677
138	PM/2 an36	35.004	62.615	1.757	0.056	0.082	0.449	99.976		0.493367	0.483316	0.0133173	0.000407414	0.00388869	0.00534994
139	PM/2 an37	35.429	62.942	1.207	0.014	0.016	0.34	99.957		0.499606	0.486082	0.00915308	0.000101904	0.000759146	0.00405319
140	PM/2 an47	38.382	59.082	0.975	0.104	0.002	0.079	98.639		0.537423	0.453049	0.0073415	0.000751654	9.42228e-05	0.000935117
141	PM/2 an48	35.518	63.214	0.486	0.098	0.013	0.374	99.738		0.501126	0.488441	0.00368745	0.000713708	0.000617133	0.00446087
142	PM-5 an 118	33.88	65.033	0.156	0	0	0.444	99.513		0.484316	0.509119	0.00119923	0	0	0.0053656
143	PM-5 an 119	33.882	65.04	0.061	0.233	0.078	0.418	99.712		0.48217	0.506888	0.000466823	0.00171152	0.00373476	0.00502872
144	PM-5 an 120	34.473	64.297	0.062	0.11	0.097	0.095	99.147		0.49102	0.501546	0.000474901	0.000808739	0.00464867	0.00114391
145	PM-5 an 121	36.333	61.331	0.015	0.328	0.102	0.101	98.238		0.514772	0.475877	0.000114287	0.00239874	0.0048624	0.00120972
146	PM-5 an 122	35.255	62.964	0.082	0.199	0.09	0.332	98.928		0.50022	0.489253	0.000625671	0.00145744	0.00429656	0.00398225
147	PM-5 an 123	33.809	64.396	0.038	0.192	0.083	0.43	98.948		0.484109	0.504975	0.000292608	0.00141908	0.00399877	0.0052051
148	PM-5 an 124	34.186	64.963	0.091	0.227	0.048	0.426	99.941		0.485248	0.50499	0.000694622	0.00166317	0.00229242	0.00511182
149	PM-5 an 125	34.511	64.764	0.092	0.124	0.086	0.073	99.65		0.489911	0.503494	0.000702327	0.00090861	0.00410767	0.000876058
150	PM-5 an 126	35.218	62.803	0.068	0.212	0.08	0.344	98.725		0.50084	0.48912	0.000520038	0.0015562	0.00382791	0.00413564
151	PM-5 an 127	36.75	62.086	0.015	0.144	0.152	0.408	99.555		0.512624	0.474281	0.000112519	0.00103681	0.00713383	0.00481118
152	PM-5 an 128	24.945	74.749	0.043	0.334	0	0.04	100.115		0.377279	0.619135	0.000349735	0.00260749	0	0.000511434
153	PM-5 an 129	25.34	72.971	0.055	0.163	0.048	0.291	98.868		0.384969	0.607113	0.000449338	0.00127821	0.00245356	0.00373733
154	PM-5 an 130	42.186	55.258	0.091	0.206	0.12	0.546	98.425		0.573934	0.411708	0.000665773	0.00144663	0.00549303	0.00627966
155	PM-5 an 131	43.044	55.755	0.071	0.073	0.105	0.107	99.17		0.580682	0.411917	0.000515081	0.000508329	0.00476598	0.00122028
156	PM-5 an 132	34.662	64.076	0.053	0.187	0.039	0.357	99.374		0.492981	0.499082	0.000405363	0.00137282	0.00186629	0.00429234
157	PM-5 an 133	35.264	63.642	0.059	0.075	0.099	0.38	99.519		0.497783	0.491986	0.00044787	0.000546469	0.00470198	0.00453463
158	PM-5 an 134	32.205	66.478	0.011	0	0.088	0.448	99.238		0.464667	0.525288	8.53499e-05	0	0.00427207	0.00546445
159	PM-5 an 135	34.397	65.708	0.038	0.111	0.055	0.029	100.338		0.486733	0.509201	0.000289165	0.000810755	0.00261861	0.000346911
160	PR-1495 an15	32.572	67.856	0.069	0.119	0.028	0.064	100.725		0.465229	0.530776	0.000529984	0.000877335	0.00134561	0.000772774
161	PR-1495 an13	38.872	60.982	0.034	0	0.017	0.468	100.373		0.534399	0.459125	0.000251361	0	0.000786347	0.00543906
162	PR-1495 an14	27.019	72.659	0.087	0.029	0.053	0.056	99.918		0.402507	0.59278	0.00069697	0.000222996	0.00265654	0.000705248
163	PR-1495 an19	21.222	79.136	0.079	0.124	0.066	0.281	100.933		0.325616	0.664957	0.000651835	0.000982057	0.00340722	0.00364481
164	PR-1495 an20	29.392	69.508	0.096	0.007	0.051	0.295	99.374		0.432348	0.559937	0.000759393	5.31493e-05	0.00252413	0.00366839
165	PR-1495 an21	38.788	59.813	0.061	0	0.036	0.443	99.204		0.537271	0.453724	0.000454378	0	0.00167778	0.0051874
166	PR-1495 an22	37.83	61.432	0.152	0.048	0.05	0.403	99.962		0.524112	0.466104	0.00113246	0.000343261	0.00233075	0.00472001
167	PR-1495 an23	26.021	72.926	0.067	0.007	0.033	0.258	99.348		0.3919	0.601498	0.000542647	5.44184e-05	0.00167226	0.00328489

## Sheet: Table S4
Table S4: Chemical composition of cervelleite
		wt. %							apfu (base 6 atoms)
		Ag	Cu	Te	S	Se	Total		Ag	Cu	Te	S	Se
1	PM-3 _ 26	72.626	0.034	21.574	5.307	0.263	99.804		3.99288	0.00317305	1.00269	0.981502	0.0197531
2	PM-3 _ 27	72.524	0.045	21.179	5.258	0.449	99.455		3.99929	0.00421229	0.987299	0.975371	0.0338246
3	PM-3 _ 28	72.385	0.19	21.442	5.17	0.832	100.16		3.96678	0.0176745	0.993337	0.953077	0.0622871
4	PM-3 _ 29	71.944	0.048	21.629	5.21	0.813	99.899		3.95396	0.004478	1.00489	0.963216	0.06104
5	PM-3 _ 30	71.711	0.0697	21.646	5.023	0.92	99.4887		3.96971	0.00654953	1.01296	0.935371	0.0695739
6	PM-3 _ 31	71.929	0.615	21.489	5.036	0.989	100.192		3.93953	0.0571769	0.994945	0.927843	0.0739985
7	PM-3 _33	71.33	0.951	21.257	5.28	0.422	99.337		3.91428	0.0885859	0.986106	0.974678	0.0316357
8	PM-3 _34	71.174	0.543	21.452	5.164	0.522	98.95		3.93955	0.0510188	1.00377	0.961523	0.0394713
9	PM-3 _35	71.082	0.338	21.5909	5.08	0.877	99.0889		3.93799	0.031786	1.01118	0.946731	0.0663743
10	PM-3 _36	71.201	0.537	21.566	5.185	0.77	99.372		3.92157	0.0502056	1.00412	0.960661	0.0579361
11	PM-3 _38	71.953	0.23	21.176	5.217	0.636	99.212		3.97299	0.0215576	0.988449	0.96903	0.0479746
12	PM-3c an1	71.476	0.781	21.09	5.24	0.605	99.308		3.92773	0.0728513	0.979716	0.968636	0.0454174
13	PM-3c an2	71.781	0.724	21.147	5.281	0.435	99.679		3.93243	0.0673278	0.97936	0.97323	0.0325556
14	PM-3c an3	71.343	0.757	20.912	5.195	0.418	98.89		3.94205	0.0710021	0.976806	0.965616	0.0315524
15	PM-3c an4	71.375	0.363	20.627	4.961	1.015	98.471		3.97933	0.0343538	0.972168	0.930423	0.0773063
16	PM-3c an8	69.679	2.52	20.276	5.131	0.437	98.169		3.83321	0.235324	0.942943	0.949535	0.0328419
17	PM-3c an9	70.097	2.052	20.957	5.283	0.498	99		3.82874	0.190256	0.967671	0.970701	0.0371597
18	PM-3c an11	70.856	0.756	21.476	5.146	0.419	98.794		3.92545	0.0710951	1.00579	0.959027	0.0317112
19	PM-3c an12	71.069	0.729	21.411	5.241	0.349	98.941		3.92504	0.0683432	0.999638	0.973701	0.0263314
20	PM-3c an13	72.249	0.268	21.071	5.068	0.933	99.722		3.97857	0.0250515	0.980893	0.938813	0.0701878
21	PM-3c an14	71.467	0.92	21.948	5.064	0.769	100.319		3.90523	0.0853362	1.01386	0.930856	0.0574054

## Sheet: Table S5
Table S5: Chemical composition of galena
		wt. %				apfu (base 2 atoms)
		Pb	S	Total		Pb	S
1	PR-1494 an 1	87.738	13.139	100.88		1.01581	0.982955
2	PBB/2a an 2	88.104	12.197	100.3		1.05248	0.941491
3	PBB/2b an 3	88.495	11.5	100		1.08331	0.909654
4	PV/1b an 4	88.792	12.239	101.03		1.05707	0.941502

## Sheet: Table S6
Table S6: Chemical composition of hessite
		wt. %						apfu (base 3 atoms)
		Ag	Te	Se	S	Total		Ag	Te	Se	S
1	PM-3 _ 24	62.834	35.133	1.359	0.093	99.536		1.9875	0.939443	0.0587243	0.00989564
2	PM-3 _ 25	62.602	36.458	0.919	0.036	100.19		1.97772	0.973667	0.0396622	0.00382583
3	PM-3 _32	63.102	36.158	0.919	0.0136	100.268		1.99178	0.964818	0.0396278	0.00144406
4	PM-3 _37	63.284	35.434	0.299	0.537	99.709		1.98609	0.940086	0.0128192	0.0566928

## Sheet: Table S7
Table S7: Chemical composition of jalpaite, mckinstryite and stromeyerite
		wt. %							apfu (base 6 atoms)
		Ag	Cu	Te	S	Se	Total		Ag	Cu	Te	S	Se
1	PM-5 an89	66.661	17.798	0.107	14.093	1.219	99.982		2.73649	1.24016	0.00371327	1.94654	0.0683628	jalpaite
2	PM-5 an70	70.952	16.403	0.067	14.205	1.08	102.951		2.86853	1.12565	0.00228992	1.93229	0.0596502	jalpaite
3	PM-5 an7	72.626	14.305	0.108	13.842	1.492	102.393		2.99203	1.00034	0.00376138	1.91871	0.0839723	jalpaite
4	PM-5 an63	73.275	13.933	0.091	13.843	1.516	102.825		3.01482	0.973051	0.00316517	1.91634	0.0852116	jalpaite
5	PM-5 an37	71.033	13.433	0.083	14.492	0.609	99.808		2.96679	0.952323	0.00293059	2.03653	0.0347486	jalpaite
6	PM-5 an36	72.148	13.362	0.07	14.458	0.698	100.872		2.99248	0.940727	0.00245446	2.01768	0.0395509	jalpaite
7	PM-5 an64	71.757	13.33	0.091	14.159	1.322	100.695		2.99147	0.943268	0.00320709	1.98605	0.0752913	jalpaite
8	PM-5 an42	71.515	13.262	0.643	14.304	0.665	100.514		2.98513	0.939637	0.0226896	2.00891	0.0379211	jalpaite
9	PM-5 an39	71.413	13.25	0.616	14.242	0.554	100.18		2.99133	0.942081	0.0218131	2.00722	0.0317023	jalpaite
10	PM-5 an14	73.885	13.156	0.664	13.403	0.054	101.41		3.11601	0.941785	0.0236734	1.90188	0.00311122	jalpaite
11	PM-5 an106	72.576	13.152	0.088	13.906	0.7	100.599		3.04661	0.937133	0.00312289	1.9641	0.0401436	jalpaite
12	PM-5 an51	71.306	13.15	0.057	14.334	0.805	99.738		2.98968	0.935858	0.00202034	2.0221	0.0461093	jalpaite
13	PM-5 an40	71.566	13.099	0.657	14.165	0.612	100.131		3.00583	0.933857	0.0233277	2.00175	0.0351157	jalpaite
14	PM-5 an18	72.401	12.972	0.062	14.226	0.682	100.485		3.02878	0.921118	0.00219263	2.00237	0.0389764	jalpaite
15	PM-5 an46	72.197	12.949	0.067	14.077	1.022	100.484		3.02488	0.920895	0.00237309	1.98443	0.0584969	jalpaite
16	PM-5 an33	71.259	12.814	0.592	14.463	0.651	99.953		2.98601	0.911425	0.0209712	2.03914	0.0372671	jalpaite
17	PM-5 an48	72.507	12.674	0.579	14.192	0.884	101.099		3.02532	0.897615	0.020423	1.99238	0.0503891	jalpaite
18	PM-5 an66	74.729	12.598	0.094	11.709	0.626	99.872		3.28236	0.939257	0.0034904	1.73043	0.0375634	jalpaite
19	PM-5 an52	72.054	12.591	0.119	14.512	0.797	100.158		3.01282	0.893636	0.00420642	2.04164	0.0455268	jalpaite
20	PM-5 an115	73.643	12.504	0.11	13.186	0.589	100.193		3.14881	0.907505	0.0039761	1.89699	0.0344052	jalpaite
21	PM-5 an9	73.389	12.431	0.088	13.624	1.539	101.202		3.08663	0.887451	0.00312886	1.92795	0.0884271	jalpaite
22	PM-5 an113	73.239	12.364	0.034	13.909	0.818	100.617		3.0848	0.883952	0.00121064	1.97114	0.0470686	jalpaite
23	PM-5 an27	71.336	12.279	0.095	14.94	0.724	99.483		2.97926	0.870459	0.00335408	2.09936	0.0413078	jalpaite
24	PM-5 an53	71.545	12.064	0.08	14.005	0.93	98.804		3.05028	0.873046	0.00288337	2.009	0.0541673	jalpaite
25	PM-5 an28	72.675	12.045	0.109	14.479	0.886	100.28		3.04419	0.856404	0.00385979	2.04062	0.0507007	jalpaite
26	PM-5 an86	72.041	11.704	0.091	13.777	0.884	98.557		3.09703	0.854052	0.00330717	1.99277	0.0519172	jalpaite
27	PM-5 an117	74.229	11.626	0.092	12.365	0.689	99.276		3.25278	0.864761	0.00340815	1.82311	0.0412471	jalpaite
28	PM-5 an29	74.033	11.516	0.094	14.211	1.034	101.033		3.10767	0.820533	0.0033357	2.00711	0.0592958	jalpaite
29	PM-5 an72	73.107	11.434	0.113	14.735	0.912	100.565		3.05559	0.811185	0.00399268	2.07216	0.0520745	jalpaite
30	PM-5 an26	73.799	11.412	0.092	14.343	0.845	100.653		3.09929	0.813502	0.00326625	2.0267	0.0484799	jalpaite
31	PM-5 an114	72.574	11.401	0.078	13.096	0.803	98.023		3.17266	0.846001	0.00288262	1.92628	0.047957	jalpaite
32	PM-5 an24	72.497	11.091	0.046	14.405	0.801	99.029		3.0819	0.800302	0.00165313	2.06039	0.0465183	jalpaite
33	PM-5 an76	72.497	10.664	0.101	13.662	1.524	98.499		3.13467	0.782668	0.00369185	1.98758	0.0900224	jalpaite
34	PM-5 an75	73.504	10.288	0.09	13.625	1.723	99.409		3.16279	0.751407	0.0032738	1.97257	0.101283	jalpaite
35	PM-5 an77	75.761	9.878	0.636	13.501	1.193	100.992		3.24409	0.717962	0.0230226	1.94514	0.0697881	jalpaite
36	PM/2 an8	75.071	9.051	0.094	13.934	1.108	99.325		3.24257	0.663589	0.00343238	2.02503	0.0653809	jalpaite
37	PM/2 an24	75.493	11.8	0.108	11.23	0.256	98.942		3.38504	0.8981	0.00409385	1.69424	0.0156816	jalpaite
38	PM/2 an17	72.156	12.054	0.076	13.26	0.39	98.076		3.13683	0.889477	0.00279307	1.93954	0.023162	jalpaite
39	PM/2 an18	71.735	13.483	0.1	13.668	0.639	99.71		3.03889	0.969517	0.00358124	1.94817	0.036981	jalpaite
40	PM/2 an19	73.225	13.456	0.057	12.433	0.708	100.052		3.15858	0.98522	0.00207853	1.80445	0.0417214	jalpaite
41	PM/2 an13	72.722	14.034	0.078	11.805	0.538	99.41		3.17568	1.04025	0.00287949	1.7345	0.0320957	jalpaite
42	PM/2 an21	70.586	14.768	0.667	13.506	0.422	100.126		2.97223	1.05553	0.0237432	1.91349	0.0242756	jalpaite
43	PM/2 an16	71.078	14.805	0.068	14.752	0.614	101.375		2.9063	1.02754	0.00235052	2.02952	0.0342978	jalpaite
44	PM/2 an4	68.518	15.65	0.71	15.084	0.493	100.518		2.79375	1.08313	0.0244732	2.06936	0.0274614	jalpaite
45	PM/2 an22	69.594	16.43	0.102	14.836	0.499	101.466		2.81818	1.12933	0.00349178	2.02139	0.0276052	jalpaite
46	PM/2 an9	61.777	21.671	0.659	16.095	0.83	101.16		2.39929	1.42863	0.0216367	2.10322	0.044038	jalpaite
47	LID-1 an7	72.559	11.357	0.822	14.428	0.027	99.23		3.08514	0.819658	0.0295465	2.06408	0.00156834	jalpaite
48	LID-1 an10	73.933	9.923	0.068	14.128	0	98.089		3.2059	0.730364	0.0024927	2.06124	0	jalpaite
49	PV-4 an4	69.239	15.244	0.084	14.93	0	100.01		2.85105	1.06546	0.00292404	2.06848	0	jalpaite
50	PV-4 an5	71.192	13.862	0.107	14.409	0	100.131		2.9724	0.982396	0.00377667	2.02417	0	jalpaite
51	PV-4 an6	71.663	12.938	0.109	14.857	0.026	100.161		2.98318	0.914191	0.00383585	2.08091	0.0014786	jalpaite
52	PM-5 an68	53.967	31.379	0.068	14.112	1.684	101.332		0.967769	0.955142	0.00103087	1.03248	0.0412552	stromeyerite
53	PM-5 an54	60.095	24.802	0.069	15.241	0.698	101.107		1.11623	0.845023	0.00108347	1.015	0.0177119	mckinstryite
54	PM-5 an15	60.784	22.044	0.034	15.264	0.375	98.717		1.21487	0.747851	0.000574472	1.02647	0.0102392	mckinstryite
55	PM-5 an60	65.665	19.642	0.072	14.636	1.592	101.636		1.30906	0.664655	0.00121341	0.981714	0.0433573	mckinstryite

## Sheet: Table S8
Table S8: Chemical composition of polybasite-pearceite series
		wt. %										apfu (base 29 atoms)
		Ag	Au	Cu	Sb	As	Te	S	Se	Total		Ag	Au	Cu	Sb	As	Te	S	Se
1	PM/2 an28	63.706	0	10.645	4.785	3.853	0.015	15.679	0.773	99.485		12.7075	0	3.60421	0.845655	1.10658	0.00252942	10.5229	0.210646
2	PM/2 an30	62.278	0	10.46	5.494	3.118	0.029	16.657	0.066	98.171		12.4086	0	3.53757	0.969859	0.894473	0.00488468	11.1666	0.0179649
3	PM/2 an31	66.029	0	8.935	5.66	2.515	0.034	16.398	0.193	99.804		13.1788	0	3.02707	1.0009	0.722742	0.00573682	11.0121	0.0526251
4	PM/2 an38	64.796	0	8.323	5.144	3.099	0.013	16.803	0	98.189		13.005	0	2.83547	0.914731	0.89554	0.00220574	11.3471	0
5	PM/2 an39	63.69	0	9.487	8.326	0.681	0	16.241	0.654	99.119		12.8542	0	3.25004	1.48882	0.19789	0	11.0287	0.180321
6	PM-3 _32	70.804	0	4.805	7.498	1.191	0.322	14.302	0.449	99.371		15.062	0	1.73501	1.41319	0.364786	0.0579068	10.2366	0.130486
7	PM-5 an5	64.158	0	11.6	1.824	5.949	0.044	16.602	0.294	100.484		12.3768	0	3.79841	0.311756	1.65236	0.00717566	10.776	0.0774818
8	PM-5 an19	63.083	0	12.116	0.932	6.622	0.068	17.062	0.211	100.147		12.0545	0	3.92988	0.157791	1.82191	0.0109849	10.9699	0.0550822
9	PM-5 an96	63.842	0	11.42	2.547	5.383	0.036	16.975	0	100.279		12.3117	0	3.73821	0.435184	1.49465	0.00586901	11.0144	0
10	PM-5 an97	62.534	0	11.425	2.535	5.307	0.017	16.645	0.441	98.927		12.2174	0	3.78881	0.438805	1.49284	0.00280776	10.9416	0.117705
11	PM-5 an102	63.548	0	10.657	2.303	5.152	0.03	16.795	0.267	98.806		12.4524	0	3.54464	0.399832	1.45355	0.00496962	11.0731	0.0714755
12	PM-5 an103	64.658	0	11.012	2.567	5.269	0.047	16.496	0.235	100.303		12.5782	0	3.63619	0.442439	1.4758	0.00772936	10.7972	0.0624535
13	PM-5 an109	65.834	0	10.315	3.62	4.919	0.503	15.478	0.644	101.401		12.9863	0	3.45374	0.632668	1.39706	0.0838791	10.2728	0.173546
14	PM-5 an110	64.319	0	10.488	3.674	4.148	0	16.336	0.48	99.516		12.6914	0	3.51277	0.642307	1.17846	0	10.8456	0.129392
15	PM-5 an111	64.589	0	10.725	3.4	4.538	0.522	15.607	0.994	100.377		12.7724	0	3.59994	0.595695	1.29205	0.0872638	10.3841	0.26853
16	PM-5 an6	63.994	0	10.753	2.807	5.523	0.019	16.344	0.945	24.693		12.4566	0	3.55283	0.484098	1.54788	0.00312653	10.7042	0.251295
17	PR-1495 an1	65.229	0.002	8.731	8.032	1.783	0.04	16.522	0.091	100.43		13.0026	0.000218333	2.95418	1.41855	0.511732	0.0067406	11.0812	0.0247813
18	PR-1495 an2	65.625	0	8.765	7.901	1.98	0.038	16.335	0	100.644		13.0937	0	2.96844	1.39671	0.5688	0.00640951	10.966	0
19	PR-1495 an3	66.46	0	8.887	7.178	1.865	0.03	15.986	0	100.406		13.347	0	3.02946	1.2772	0.53927	0.00509326	10.8019	0
20	PR-1495 an4	68.008	0.008	8.45	4.49	3.479	0.053	15.885	0.077	100.45		13.6073	0.000876599	2.8698	0.795955	1.00223	0.00896471	10.6939	0.0210472
21	PR-1495 an5	66.156	0.016	8.993	5.234	3.193	0.082	16.239	0.047	99.96		13.1915	0.00174722	3.0438	0.924681	0.916702	0.0138226	10.8949	0.0128032
22	PR-1495 an6	68.812	0	8.531	5.154	3.508	0.026	15.213	0	101.244		13.8466	0	2.91384	0.918875	1.01635	0.00442286	10.2999	0
23	PR-1495 an8	63.357	0.136	10.308	8.028	2.051	0.02	16.384	0.154	100.438		12.5547	0.0147588	3.46715	1.40946	0.585169	0.00335037	10.9237	0.0416895
24	PR-1495 an16	65.628	0.204	9.643	4.565	4.36	0.054	16.685	0	101.139		12.8064	0.0218006	3.194	0.789241	1.22497	0.00890802	10.9547	0
25	PBB/4 an1	75.403	2.801	0.006	6.929	1.475	0.074	14.046	0.35	101.084		16.44	0.334447	0.00222049	1.33849	0.463029	0.0136394	10.3039	0.10425
26	PBB/4 an2	75.577	2.794	0	6.574	2.138	0.034	14.383	0.146	101.646		16.2795	0.329593	0	1.25462	0.663073	0.00619127	10.4241	0.0429633
27	PBB/4 an3	76.134	2.752	0	5.859	2.286	0.045	14.182	0.325	101.583		16.4372	0.325385	0	1.12074	0.710604	0.00821317	10.302	0.0958573
28	PBB/4 an4	74.061	2.598	0.035	7.281	1.555	0.055	14.658	0.374	100.617		16.0151	0.307666	0.0128467	1.39496	0.484142	0.0100543	10.6648	0.110485
29	PBB/4 an5	73.177	2.856	0	7.217	1.653	0.086	14.807	0.327	100.123		15.854	0.338862	0	1.38533	0.515632	0.0157512	10.7936	0.0967844
30	PBB/4 an6	75.085	2.587	0	6.776	1.623	0.046	14.23	0.006	100.353		16.4005	0.309458	0	1.31132	0.510419	0.00849401	10.458	0.0017904
31	PBB/4 an7	74.461	2.683	0.024	6.619	1.499	0.077	14.647	0.294	100.304		16.1458	0.318604	0.00883336	1.27161	0.467987	0.0141147	10.686	0.0870904
32	PBB/4 an8	75.048	2.79	0.025	7.067	1.728	0.01	14.315	0.347	101.33		16.2399	0.330636	0.0091827	1.35491	0.538383	0.00182934	10.4225	0.102581
33	PBB/4 an10	75.308	2.718	0.008	7.067	1.621	0.084	14.499	0.354	101.659		16.208	0.320361	0.00292257	1.34759	0.502314	0.0152834	10.4994	0.104085
34	PBB/4 an13	73.477	4.875	0.029	7.467	0.975	0.029	14.161	0.166	101.179		16.1288	0.586039	0.0108052	1.45221	0.308148	0.00538145	10.4588	0.0497798
35	PBB/4 an15	73.436	4.162	0	6.775	0.765	0.054	14.103	0.169	99.464		16.3132	0.506329	0	1.33343	0.244678	0.0101408	10.5409	0.0512874
36	PBB/4 an16	74.151	3.455	0	5.427	0.826	0.082	13.919	0.195	98.055		16.6427	0.424673	0	1.07919	0.266925	0.0155586	10.5112	0.0597908
37	PBB/4 an19	72.63	4.769	0.045	5.891	1.645	0.058	13.68	0.25	98.968		16.2867	0.585659	0.0171283	1.17041	0.531111	0.010995	10.3214	0.0765861
38	PBB/4 an20	75.203	2.664	0.048	4.518	1.665	0.069	14.658	0.149	98.974		16.4317	0.318774	0.0178022	0.874633	0.523799	0.0127452	10.7761	0.0444762
39	PBB/4 an21	74.679	2.693	0.047	6.228	1.4	0.042	14.203	0.195	99.487		16.4245	0.324363	0.017546	1.2136	0.443329	0.00780897	10.5102	0.0585899
40	PBB/4 an22	70.497	5.063	0.061	6.51	2.644	0.105	14.371	0.221	99.468		15.528	0.611	0.0232714	1.269	0.838	0.0199501	10.648	0.066
41	PBB/4 an23	74.494	2.661	0.01	8.496	0.741	0.043	14.727	0.212	101.384		16.0691	0.314352	0.00366148	1.62374	0.23014	0.00784133	10.6886	0.0624742

## Sheet: Table S9
Table S9: Chemical composition of sphalerite
									apfu (base 2 atoms)
		Zn	Fe	Mn	Cd	S	Total		Zn	Fe	Mn	Cd	S
1	PR-1494_ 1	65.245	1.016	0.048	0.483	32.911	100.074		0.974622	0.0177666	0.00085327	0.00419639	1.00256
2	PR-1494_ 2	64.826	1.17	0.051	0.392	32.856	100.071		0.971266	0.0205209	0.000909317	0.00341598	1.00389
3	PR-1494_ 3	65.194	1.686	0.071	0.367	32.803	100.13		0.970432	0.029379	0.00125769	0.00317734	0.995754
4	PR-1494_ 4	64.55	2.117	0.091	0.611	32.702	100.071		0.962132	0.0369387	0.00161412	0.00529688	0.994018
5	PBB/2a_1	67.159	0.521	0.066	0.64	32.818	101.349		0.993877	0.00902585	0.00116233	0.00550869	0.990426
6	PBB/2a_2	66.953	0.426	0.05	0.482	33.173	101.115		0.988665	0.00736394	0.000878628	0.00413967	0.998953
7	PBB/2a_3	66.445	0.406	0.072	0.573	32.988	100.524		0.98721	0.00706147	0.00127302	0.00495156	0.999504
8	PBB/2b_1	66.215	0.382	0.062	0.664	32.774	100.097		0.988592	0.00667645	0.00110156	0.00576592	0.997864
9	PBB/2b_2	65.957	0.378	0.043	0.605	32.602	99.653		0.989693	0.00663977	0.000767828	0.00528001	0.99762
10	PV/1b an1	66.199	0.811	0.107	0.665	33.072	101.171		0.979955	0.0140539	0.00188493	0.00572554	0.998381
11	PV/1b an2	66.079	1.034	0.059	0.507	33.847	101.599		0.966924	0.0177121	0.00102739	0.00431496	1.01002
12	PV/1b an3	64.915	1.946	0.068	0.558	33.473	100.995		0.955616	0.0335353	0.00119125	0.00477763	1.00488
13	PV/1b an4	65.905	0.896	0.067	0.52	32.522	99.994		0.986172	0.0156951	0.00119307	0.00452562	0.992414
14	PM-2 an1	64.613	0.192	1.358	0.206	32.659	99.057		0.970346	0.00337543	0.0242696	0.00179934	1.00021
15	PM-2 an49	64.054	0.317	1.214	0.255	32.455	98.403		0.96902	0.00561394	0.0218555	0.00224371	1.00127
16	PM-2 an50	64.951	0.204	0.735	0.223	32.581	98.729		0.979382	0.00360096	0.0131889	0.00195574	1.00187
17	PM-2 an51	65.865	0.33	0.552	0.166	32.879	99.865		0.982657	0.00576345	0.00980037	0.00144044	1.00034
18	PR-1495 an28	65.717	0.906	0.036	0.378	32.784	100.262		0.981607	0.015842	0.00063991	0.00328391	0.998627
19	PR-1495 an29	66.234	0.539	0.206	0.332	32.853	100.267		0.986356	0.00939644	0.0036507	0.00287562	0.997721
20	PR-1495 an30	65.718	0.495	0.223	0.538	32.719	99.806		0.983805	0.00867464	0.0039727	0.00468432	0.998863
21	PR-1495 an31	65.825	0.485	0.084	0.541	32.76	99.718		0.985294	0.00849843	0.00149627	0.00470991	1
22	PR-1495 an32	65.199	0.492	0.197	0.472	32.698	99.1		0.980694	0.00866322	0.00352627	0.00412928	1.00299
23	PM-5_ 136	65.972	0.212	0.377	0.251	32.471	99.283		0.991814	0.00373103	0.00674479	0.00219475	0.995515
24	PM-5_ 137	66.269	0.243	0.444	0.235	32.653	99.844		0.99051	0.00425184	0.00789747	0.00204294	0.995298
25	PM-5_ 138	66.488	0.175	0.276	0.284	32.183	99.406		1.00119	0.00308486	0.00494585	0.00248733	0.988287
26	PM-5_ 139	66.162	0.207	0.412	0.247	32.437	99.465		0.99352	0.00363881	0.00736243	0.00215727	0.993322
27	PM-5_ 140	65.992	0.219	0.321	0.206	32.066	98.804		0.998801	0.0038802	0.00578161	0.00181341	0.989724
28	PM-5_ 141	66.46	0.206	0.29	0.253	32.565	99.774		0.994886	0.00360996	0.00516615	0.00220279	0.994135
29	PM-5_ 142	65.964	0.225	0.348	0.234	32.199	98.97		0.996126	0.00397751	0.00625378	0.00205524	0.991588
30	PM-5_ 143	65.928	0.219	0.628	0.224	32.666	99.665		0.986372	0.00383563	0.0111812	0.00194921	0.996662
31	PM-5_ 144	66.316	0.223	0.539	0.245	32.606	99.929		0.990867	0.00390053	0.0095839	0.00212914	0.993519
32	PM-5_ 145	66.379	0.158	0.421	0.267	32.401	99.626		0.995966	0.00277519	0.00751714	0.00233005	0.991411
33	PM-5_ 146	65.863	0.167	0.579	0.198	32.454	99.261		0.990077	0.00293877	0.0103577	0.00173114	0.994895
34	PM-5_ 147	66.523	0.141	0.343	0.223	32.261	99.491		1.00023	0.0024818	0.0061373	0.00195017	0.989204
35	PM-5_ 148	66.371	0.128	0.348	0.182	32.47	99.499		0.996136	0.00224891	0.00621549	0.00158874	0.993811
36	PM-5_ 149	66.446	0.19	0.318	0.23	32.839	100.023		0.990628	0.00331602	0.0056419	0.00199439	0.99842
37	PM-5_ 150	66.448	0.199	0.356	0.222	32.778	100.003		0.991185	0.00347494	0.00631944	0.00192604	0.997095
38	PM-5_ 151	66.453	0.135	0.361	0.207	32.311	99.467		0.998896	0.00237553	0.00645757	0.00180974	0.990461
39	PM-5_ 152	66.504	0.168	0.426	0.165	32.563	99.826		0.994755	0.00294171	0.00758288	0.00143546	0.993285
40	PM-5_ 153	66.674	0.148	0.379	0.203	32.745	100.149		0.993701	0.00258216	0.00672194	0.00175969	0.995235
41	PM-5_ 154	66.229	0.145	0.518	0.247	32.385	99.524		0.994417	0.00254865	0.00925564	0.00215704	0.991621
42	PM-5_ 155	66.315	0.159	0.405	0.183	32.245	99.307		0.998368	0.00280219	0.00725588	0.0016024	0.989971
43	PLA-2_ 1	64.255	1.43	0.247	0.751	32.666	99.349		0.964243	0.025121	0.00441096	0.0065548	0.99967
44	PLA-2_ 2	64.293	1.488	0.256	0.551	32.733	99.321		0.963823	0.0261131	0.00456699	0.00480424	1.00069
45	PLA-2_ 3	64.769	1.327	0.229	0.499	32.804	99.628		0.968274	0.0232233	0.00407402	0.00433882	1.00009
46	PLA-2_ 4	64.524	1.333	0.242	0.48	32.399	98.978		0.972311	0.0235145	0.00433966	0.00420693	0.995628
47	PLA-2_ 5	65.147	1.066	0.213	0.494	32.651	99.571		0.975832	0.0186922	0.00379679	0.00430376	0.997375
48	PLA-2_ 6	63.748	1.046	0.202	0.692	31.194	96.882		0.986587	0.0189506	0.00372029	0.00622895	0.984513
49	PLA-2_ 7	64.562	1.429	0.241	0.61	32.309	99.151		0.972581	0.0252001	0.00432038	0.00534464	0.992553
50	PLA-3_ 1	64.932	0.812	0.33	0.502	32.318	98.894		0.980303	0.0143509	0.00592887	0.00440804	0.99501
51	PLA-3_ 2	64.173	1.416	0.184	0.749	31.711	98.233		0.978594	0.0252776	0.00333906	0.00664312	0.986147
52	PLA-3_ 3	64.936	0.85	0.216	0.551	32.458	99.011		0.978687	0.0149968	0.00387408	0.00483003	0.997612
53	PLA-3_ 4	64.538	1.206	0.306	0.603	32.152	98.805		0.976131	0.0213531	0.0055077	0.00530457	0.991704
54	PLA-3_ 5	64.714	0.966	0.253	0.542	32.511	98.986		0.974896	0.0170357	0.00453562	0.00474897	0.998784
55	PLA-3_ 6	64.43	1.278	0.171	0.388	31.928	98.195		0.980177	0.0227598	0.00309577	0.00343311	0.990534
56	PLA-3_ 7	64.162	1.607	0.2	0.649	32.428	99.046		0.966374	0.0283338	0.00358471	0.00568528	0.996022
57	PLA-3_ 8	64.959	0.915	0.24	0.598	32.1	98.812		0.983295	0.0162139	0.00432327	0.00526485	0.990903
58	PLA-3_10	64.249	1.225	0.194	0.526	32.28	98.474		0.973112	0.0217197	0.00349667	0.00463364	0.997038
59	PLA-2_ 8	64.759	1.323	0.321	0.566	32.59	99.559		0.970319	0.0232058	0.00572369	0.00493254	0.995819
60	PLA-2_ 9	65.424	0.825	0.197	0.551	32.501	99.498		0.982165	0.0144985	0.00351941	0.00481104	0.995006
61	PLA-2_ 10	65.277	1.103	0.202	0.32	32.079	98.981		0.985957	0.0195027	0.00363083	0.00281117	0.988098

## Sheet: Table S10
Table S10: Chemical composition of uytenbogaardtite
		wt. %						apfu (base 6 atoms)
		Ag	Cu	Au	S	Total		Ag	Cu	S	Au	total
1	PK-1 an1	55.399	0	32.707	10.772	99.009		3.03119	0	1.98269	0.980059	6
2	PR-1495 an17	54.218	0.954	33.857	10.516	99.648		2.96162	0.0884583	1.93234	1.01282	6
3	PR-1495 an18	54.58	1.262	33.241	10.712	99.872		2.94958	0.115768	1.94735	0.983786	6
4	PR-1495 an24	52.737	2.297	32.603	10.433	98.154		2.88554	0.213342	1.9203	0.976942	6
5	PBB/4 an11	54.716	0	33.442	10.51	98.721		3.02772	0	1.95637	1.01343	6
6	PV-4 an9	55.287	0	33.391	10.973	99.667		3.00202	0	2.00431	0.992935	6
7	PV-1a an1	54.438	0.212	33.913	10.466	99.123		3.00532	0.0198669	1.94365	1.02531	6

## Sheet: Table S11
Table S11: Chemical composition of johannsenite
		wt. %									apfu (base 6 oxygens)
		CaO	Na2O	MnO	MgO	FeO	SiO2	Al2O3	Total		Ca	Na	Mn	Mg	Fe	Si	Al
1	PM/2 _Mn px 64	22.954	0.099	20.747	5.114	0.262	50.518	0.352	100.134		0.970272	0.0075724	0.693261	0.300764	0.00864428	1.99294	0.0163662
2	PM/2 _Mn px 71	22.845	0.08	22.505	4.687	0.426	50.094	0.273	101.086		0.964728	0.00611318	0.751275	0.275383	0.0140416	1.9743	0.0126808
3	PM/2 _Mn px 54	22.75	0	25.102	2.586	0.56	49.169	0.085	100.285		0.984405	0	0.858632	0.155686	0.0189135	1.98562	0.00404558
4	PM/2 _Mn px 60	22.685	0.065	20.762	5.338	0.212	50.139	0.523	99.936		0.960166	0.00497834	0.694677	0.314351	0.00700383	1.9806	0.0243488
5	PM/2 _Mn px 58	22.128	0.087	21.34	5.418	0.259	50.571	1.023	101.031		0.925355	0.00658337	0.705451	0.315235	0.00845392	1.9737	0.0470555
6	PM/2 _Mn px 70	21.96	0.122	27.932	1.14	0.323	48.6	0.322	100.652		0.956095	0.00961152	0.961341	0.0690562	0.0109765	1.97478	0.0154203
7	PM/2 _Mn px 52	21.724	0.058	29.188	0.513	0.36	48.528	0.286	100.735		0.950226	0.0045907	1.00925	0.0312201	0.0122909	1.98104	0.0137601
8	PM/2 _Mn px 61	21.508	0.067	27.369	1.374	0.274	49.073	0.406	100.251		0.934719	0.00526889	0.940257	0.0830801	0.00929446	1.99038	0.0194078
9	PM/2 _Mn px 66	21.091	0.07	28.646	1.093	0.354	48.611	0.196	100.146		0.924681	0.00555336	0.992808	0.0666721	0.0121141	1.98903	0.00945192
10	PM/2 _Mn px 57	20.603	0.047	28.755	1.362	0.264	48.184	0.474	99.812		0.905196	0.00373657	0.998693	0.0832566	0.00905333	1.97573	0.0229066
11	PM/2 _Mn px 68	19.519	0.031	32.524	0.376	0.143	48.443	0.085	101.236		0.855747	0.00245931	1.12719	0.0229353	0.00489346	1.98213	0.00409898
12	PM-3 _Mn px 17	22.886	0.024	26.278	1.783	0.485	49.114	0.133	100.872		0.988249	0.0018753	0.897006	0.107122	0.0163467	1.97931	0.00631709
13	PM-3 _Mn px 18	22.908	0.126	20.757	4.665	1.211	49.829	0.596	100.284		0.971668	0.00967085	0.695988	0.275303	0.0400929	1.97254	0.0278065

[truncated: 8 more sheets: Table S12, Table S13, Table S14, Table S15, Table S16, Table S17, Table S18, Table S19]
