# Supplementary material for: Evolution of the epithermal mineralization in the Pukanec deposit, Štiavnické vrchy Mts. (Slovakia)
Source: Research Square preprint supplement (doi:10.21203/rs.3.rs-8701398/v1), 2026-02-17
Supplement: Supplementary file 2 [file 2a04a65b8072ad9ab8742f19.docx]

**Table S1:** Sampling sites, sample codes, their GPS coordinates, and a brief description.

| **Locality, vein system** | **Sample label** | **GPS coordinates**  **(UTM-34N)** | **m.a.s.l. (m)** | **Brief description** | **Ore*** | **Gangue** |
| --- | --- | --- | --- | --- | --- | --- |
| Pukanec – Pod Skalou | PPS | E 329007, N 5356733 | 363 | Accessible old adit | Au/Ag alloys | Qtz, Mn-oxides |
| Pukanec - Liešna dolina | LID | E 327797, N 5361426 | 348 | Stream sediments from the local creek | Au/Ag alloys |  |
| Pukanec – Starý Jarok | PNB | E 330588, N 5358877 | 400 | Stream sediments from the local creek | Au/Ag alloys |  |
| Pukanec – Dorothea | PDO | E 329518, N 5358054 | 487 | Accessible old adit | Au/Ag alloys | Qtz, Kfs |
| Pukanec – Ostrý vrch | PK, POV, PR-1522 | E 327998, N 5358394 | 622 | Exploration pits and trenches, small waste dumps in a forest | Au/Ag alloys | Qtz, Kfs |
| Pukanec- Ladislav | PLA | E 328879, N 5360436 | 533 | Waste dump of the inaccessible Ladislav adit | Gn, sp, ccp | Cal, qtz, kfs |
| Pukanec – Biela Baňa | PBB | E 329416, N 5358731 | 600 | Small waste dump of exploration pit in the forest | Gn, sp, ccp, aca, plb, uyt | Cal, qtz, kfs |
| Pukanec – Viktória | PV | E 328999, N 5359357 | 718 | Exploration pits and trenches, small waste dumps in a forest | Sp, gn, aca, jal, uyt, Au/Ag alloy | Qtz |
| Pukanec – Michal | PM | E 329797, N 5359650 | 632 | Waste dump of the inaccessible Michal shaft | Sp, aca, pea, plb, smy, hes, cvl | Qtz, cal, rdn, jhn |
| Pukanec – Gabe Gottes | PR 1495 | E 328366, N 5359756 | 509 | Waste dump of the accessible adit | Gn, sp, ccp, aca, pea, plb, uyt, Au/Ag alloys | Cal, qtz |

* Mineral abbreviations (after Warr, 2021).
