# Supplementary material for: Evolution of the epithermal mineralization in the Pukanec deposit, Štiavnické vrchy Mts. (Slovakia)
Source: Research Square preprint supplement (doi:10.21203/rs.3.rs-8701398/v1), 2026-02-17
Supplement: Supplementary file 3 [file c4d6f185454d6355720c73b2.xlsx]

## Sheet: Biela Baňa vein - calcite
	ice	frac.		at Th	at Th	at Th
Th °C	Tm °C	x(NaCl)	w(NaCl) hm%	V (cm3/mol)	ρ (g/cm3)	P (MPa)
243.3	-1.6	0.0086	2.74	22.02	0.83	3.5
244.6	-1.6	0.0086	2.74	22.1	0.83	3.57
248.6	-1.4	0.007545	2.41	22.24	0.82	3.83
300	-1.8	0.009649	3.06	24.55	0.75	8.46
239.7	-1.7	0.009125	2.9	21.88	0.84	3.27
238.2	-1.5	0.008073	2.57	21.86	0.84	3.19
239	-1.5	0.008073	2.57	21.88	0.84	3.24
239.3	-1.6	0.0086	2.74	21.88	0.84	3.25
235.5	-1.6	0.0086	2.74	21.75	0.84	3.04
229.7	-2	0.010693	3.39	21.52	0.86	2.72
276	-1.8	0.009649	3.06	23.31	0.79	5.94
295.2	-0.8	0.0043	1.39	24.62	0.74	7.96
267.5	-0.6	0.0032672	1.05	23.19	0.78	5.26
283.5	-0.8	0.0043	1.39	23.94	0.76	6.71
238.3	-1.5	0.008073	2.57	21.86	0.84	3.2
236.1	-1.5	0.008073	2.57	21.78	0.84	3.78
229.1	-1.6	0.0086	2.74	21.54	0.85	2.7
267.8	-1.4	0.007545	2.41	23.02	0.79	5.25
270.6	-1.5	0.008073	2.57	23.12	0.79	5.48
325.7	-0.8	0.004345	1.4	26.94	0.68	12.07
305.6	-0.9	0.004882	1.57	25.26	0.72	9.21
274.8	-1.1	0.005951	1.91	23.41	0.78	5.87
359.7	-0.9	0.0048819	1.57	31.34	0.58	18.42
291.4	-1.2	0.006484	2.07	24.25	0.75	7.51
277.2	-0.8	0.004345	1.4	23.61	0.77	6.1
299.8	-0.8	0.0043	1.4	24.91	0.73	8.5
235.9	-0.3	0.00164	0.53	21.94	0.82	3.1
232	-0.3	0.0016	0.53	21.8	0.83	2.89
238.3	-0.5	0.002726	0.88	22	0.82	3.23
240.2	-1.3	0.007015	2.24	21.95	0.83	3.31
237.9	-1.3	0.007015	2.24	21.87	0.84	3.18
243.8	-0.7	0.0038	1.22	22.17	0.82	3.55
242.9	-0.6	0.003267	1.05	22.15	0.82	3.5
252	-0.6	0.003267	1.05	22.51	0.81	4.09
234.7	-1.5	0.008073	2.57	21.74	0.84	3
236.3	-1.4	0.007545	2.41	21.8	0.84	3.1

## Sheet: Biela Baňa vein - quartz
	ice	frac.		at Th	at Th	at Th
Th °C	Tm °C	x(NaCl)	w(NaCl) hm%	V (cm3/mol)	ρ (g/cm3)	P (MPa)
258.2	-0.5	0.0027261	0.879	22.7892	0.79534	4.5337
193.8	-0.8	0.0043451	1.39599	20.6021	0.88295	1.35067
220.6	-1	0.0054174	1.73635	21.3413	0.854399	2.32159
227.5	-1	0.0054174	1.73635	21.5597	0.845745	2.6436
265.4	-1.3	0.0070151	2.24052	22.919	0.798402	5.02484
228.7	-1.1	0.0059514	1.9052	21.5871	0.84567	2.70039
262.5	-1.1	0.0059514	1.90525	22.8512	0.79889	4.83586
247.4	-1.7	0.0091254	2.90099	22.1393	0.830374	3.71792
233.5	-0.9	0.0048819	1.5666	21.7721	0.8365	2.95355
230	-0.9	0.0048819	1.5666	21.6539	0.841065	2.77111
234.1	-0.9	0.0048819	1.5666	21.7926	0.83571	2.98574
234.2	-1.6	0.0086	2.73712	21.7094	0.84584	2.97133
230	-0.6	0.0032672	1.05221	21.6923	0.836566	2.77909
243.1	-0.7	0.0038068	1.22453	22.1408	0.8206	3.50201
243.2	-0.7	0.0038068	1.22453	22.1408	0.8206	3.50201
246.8	-0.6	0.0032672	1.0522	22.279	0.814539	3.70445
237.8	-0.5	0.0027261	0.87901	21.9802	0.82461	3.2022
234.7	-0.5	0.002726	0.87901	21.8691	0.828805	3.02964
237.3	-0.6	0.0032672	1.0522	21.9472	0.82685	3.17089
240.9	-0.7	0.0038068	1.22453	22.0629	0.823505	3.37592
242.2	-1.1	0.0059514	1.90525	22.0506	0.827896	3.44077
231.4	-1.3	0.0070151	2.24052	21.652	0.845121	2.83216
235.6	-1.4	0.0075448	2.40689	21.7799	0.84114	3.0529
260.6	-1.3	0.0070151	2.24052	22.7321	0.804969	4.68123
240.2	-1.2	0.0064839	2.07331	21.9649	0.832106	3.31916
242.1	-1.4	0.0075448	2.40688	22.0049	0.832543	3.42521
278.4	-1.2	0.0064839	2.0733	23.5625	0.775687	6.19602
234	-1.3	0.0070151	2.24052	21.7384	0.841766	2.96906
239.9	-1.3	0.0070151	2.24052	21.9407	0.834001	3.29859
233.4	-1.4	0.0075448	2.40689	21.7063	0.843995	2.93423
232.7	-1.4	0.0075448	2.40688	21.6832	0.844896	2.89723
234.7	-1.3	0.0070151	2.24052	21.7619	0.840855	3.00677
262.7	-0.9	0.0048819	1.5666	22.9008	0.795272	4.86002
249.8	-0.8	0.0043451	1.39599	22.3849	0.81263	3.93164
222.7	-1.4	0.0075448	2.40689	21.3651	0.85747	2.40674

## Sheet: Viktória vein - amethyst
	ice	frac.		at Th	at Th	at Th
Th °C	Tm °C	x(NaCl)	w(NaCl) hm%	V (cm3/mol)	ρ (g/cm3)	P (MPa)
212.9	-1.8	0.009649	3.06403	21.0424	0.874666	1.98289
217.3	-1.4	0.0075448	2.40689	21.2028	0.86404	2.17
198.1	-1.4	0.0075448	2.40689	20.6728	0.88618	1.471
231.4	-1.3	0.007015	2.2405	21.652	0.845121	2.8321
203.9	-1.4	0.007544	2.40689	20.8256	0.87968	1.66029
184	-0.8	0.004345	1.39599	20.3573	0.89356	1.08799
213.4	-2.4	0.01276	4.0251	21.0117	0.881933	1.9905
219.9	-2.5	0.0132765	4.18244	21.1858	0.87566	2.2569
215.5	-1.4	0.0075448	2.40689	21.15	0.866194	2.09533
237.8	-1.9	0.0101719	3.2262	21.7942	0.84546	3.16037
164.4	-2	0.01069	3.38765	19.8735	0.928235	0.674475
238.1	-1.6	0.0086	2.73712	21.84	0.84078	3.18623
208.3	-2.1	0.01121	3.54823	20.8944	0.88388	1.80315
203.7	-1.2	0.00648	2.07331	21.835	0.8772	1.65688
230.2	-1.6	0.0086	2.73712	21.5793	0.85093	2.7626
188	-1.5	0.00807	2.5724	20.4152	0.89841	1.1608
166.4	-1.6	0.0086	2.73712	19.9268	0.921506	0.711945
190.1	-1.7	0.009125	2.90099	20.4552	0.8987	1.23419
181.6	-1.6	0.0086	2.73712	20.2598	0.906363	1.02127
216	-2.1	0.0112126	3.548	21.1062	0.875016	2.1011
169.8	-1.6	0.0086	2.73712	19.9985	0.918202	0.773622
205.5	-1.5	0.008073	2.5724	20.861	0.8792	1.71392
187.1	-1.5	0.0080732	2.5724	20.393	0.89937	1.15747
173.4	-1.6	0.0086	2.73712	20.076	0.91465	0.8434
175.7	-1.5	0.00807	2.572	20.1307	0.9111	0.89164
199.4	-1.5	0.00807	2.572	20.6999	0.88605	1.51033
193.2	-1.5	0.00807	2.572	20.542	0.8928	1.3232
232.3	-1.3	0.0070151	2.2405	21.681	0.84396	2.87898
175.8	-2.3	0.01224	3.86695	20.1027	0.92077	0.8858
187.1	-1.5	0.00807	2.572	20.393	0.8993	1.1574
233	-1.6	0.0086	2.73712	21.6699	0.84737	2.9075
227.8	-1.6	0.0086	2.737	21.503	0.85395	2.64301
221.4	-1.6	0.0086	2.73712	21.3063	0.8618	2.3434
231.4	-1.6	0.0086	2.73712	21.617	0.7494	2.82404
235.9	-1.6	0.0086	2.73712	21.7658	0.84364	3.06359
182.9	-1.5	0.008073	2.5724	20.2945	0.90376	1.0531
203.5	-1.6	0.0086	2.73712	20.8008	0.8827	1.643
221.4	-2.8	0.014808	4.64968	21.2056	0.8777	2.3159
225	-2.1	0.011212	3.54823	21.3684	0.864	2.49632
224.7	-0.9	0.0048819	1.5665	21.481	0.84783	2.5115
221.2	-1.5	0.008073	2.5724	21.3097	0.860704	2.3367
228.4	-0.6	0.003267	1.0522	21.6384	0.83865	2.6984
227.7	-2	0.01069	3.387	21.4599	0.8596	2.6279
241.5	-0.6	0.00326	1.0522	22.1007	0.8211	3.4114
232.1	-0.6	0.00326	1.0522	21.764	0.8338	2.8877
253.4	-0.9	0.00488	1.5665	22.5104	0.80906	4.17303
228.6	-0.9	0.004882	1.5665	21.607	0.8428	2.7
202.7	-1	0.005417	1.7363	20.823	0.8756	1.6263
223.6	-0.9	0.0048819	1.5665	21.4459	0.84922	2.46

## Sheet: Gabe Gottes vein - calcite
	ice	frac.		at Th	at Th	at Th
Th °C	Tm °C	x(NaCl)	w(NaCl) hm%	V (cm3/mol)	ρ (g/cm3)	P (MPa)
219.1	-1.7	0.009125	2.9	21.29	0.87	2.24
189.9	-1.2	0.006484	2.07	20.48	0.89	1.24
219.5	-1.5	0.0080731	2.57	21.26	0.86	2.26
249.8	-1.1	0.0059514	1.91	22.33	0.82	3.92
297.2	-1.3	0.0070151	2.24	24.56	0.75	8.16
243.6	-1.9	0.010172	3.23	21.99	0.84	3.5
302.3	-0.4	0.002184	0.71	25.26	0.72	8.84
247.4	-1.6	0.0086	2.74	22.17	0.83	3.75
251.9	-0.7	0.003807	1.22	22.49	0.81	4.08
277.4	-0.7	0.0038068	1.22	23.65	0.77	6.13
298.5	-0.7	0.0038068	1.22	24.86	0.73	8.35
337	-0.6	0.0032672	1.05	28.32	0.64	13.98
259.9	-0.6	0.0032672	1.05	22.84	0.79	4.66
227.8	-0.5	0.0027261	0.88	21.63	0.84	2.67
290.2	-1.2	0.0064839	2.07	24.18	0.76	7.38
240.6	-1	0.0054174	1.74	22	0.83	3.35
296	-1.2	0.0064839	2.07	24.52	0.75	8.03
306.9	-1.9	0.0101719	3.23	24.94	0.74	9.3
318.5	-0.4	0.0021837	0.71	26.55	0.68	11.02
342.4	-0.1	0.000548	0.18	29.72	0.61	15.03
264.2	-2	0.010693	3.39	22.76	0.81	4.93
319.2	-1.2	0.0064839	2.07	26.12	0.7	11.05
281.5	-1.2	0.0064839	2.07	23.72	0.77	6.49
253.6	-1.8	0.0096494	3.06	22.67	0.82	4.15
355.5	-0.8	0.0043451	1.4	30.76	0.59	17.53
255.2	-0.8	0.0043451	1.4	22.6	0.8	4.3
340.4	-1.3	0.0070151	2.24	28.05	0.65	14.5
331.1	-1.8	0.0096493	3.06	26.77	0.69	14.84
307.3	-2	0.0106929	3.39	24.93	0.74	9.34
310.8	-1.8	0.0096493	3.06	25.23	0.73	9.82
246.6	-0.6	0.0032672	1.05	22.29	0.81	3.73
200.2	-0.6	0.0032672	1.05	20.79	0.87	1.55
212	-1	0.0054174	1.74	21.08	0.86	1.96
272	-1.1	0.0059514	1.91	23.28	0.78	5.62

## Sheet: Dorothea vein - quartz
	ice	frac.		at Th	at Th	at Th
Th °C	Tm °C	x(NaCl)	w(NaCl) hm%	V (cm3/mol)	ρ (g/cm3)	P (MPa)
260.1	-1.3	0.007015	2.24	22.71	0.81	4.64
256.5	-1.3	0.007015	2.24	22.56	0.81	4.38
237.2	-0.8	0.00435	1.4	21.91	0.83	3.16
242.8	-0.9	0.004882	1.57	22.1	0.82	3.48
252.7	-0.9	0.004882	1.57	22.48	0.81	4.12
268.7	-0.9	0.004882	1.57	23.17	0.79	5.35
263	-1.2	0.0065	2.07	22.85	0.8	4.87
261.5	-0.7	0.003807	1.22	22.89	0.79	4.78
247.2	-0.7	0.003807	1.22	22.3	0.81	3.76
254.8	-0.7	0.003807	1.22	22.6	0.8	4.28
280.6	-0.6	0.003267	1.05	23.84	0.76	6.4
313.2	-0.7	0.003807	1.22	25.92	0.7	10.24
289.6	-1.7	0.0091254	2.9	24	0.77	7.29
240.1	-1.7	0.009125	2.9	21.9	0.84	3.3
188.4	-1.5	0.008073	2.57	20.42	0.9	1.19
318	-1	0.005417	1.74	26.14	0.7	10.89
307.4	-0.7	0.0038068	1.22	25.48	0.71	9.46
284.9	-0.7	0.0038068	1.22	24.05	0.76	6.86
356	-0.7	0.0038068	1.22	31.04	0.59	17.66
389.4	-0.9	0.0048818	1.57	40.95	0.44	25.56
250.3	-0.7	0.0038068	1.22	22.42	0.81	3.97
246.6	-0.9	0.0048819	1.57	22.24	0.82	3.72
253.4	-0.9	0.0048819	1.57	22.51	0.81	4.17
185.6	-0.6	0.0032672	1.05	20.41	0.89	1.13
171.8	-0.6	0.0032672	1.05	20.1	0.9	0.82
266	-1	0.0054173	1.74	23.03	0.79	5.12
211	-1.4	0.0075448	2.41	21.02	0.87	1.92
188.7	-0.7	0.0038068	1.22	20.48	0.89	1.21
202.3	-0.8	0.0043451	1.4	20.83	0.87	1.62
266.7	-0.8	0.0043451	1.4	23.1	0.79	5.19
182	-0.7	0.0038069	1.22	20.31	0.89	1.04
222	-1.6	0.0086	2.74	21.32	0.86	2.37
212.5	-0.7	0.0038068	1.22	21.13	0.86	1.99
248.7	-1.7	0.0091254	2.9	22.2	0.83	3.83
249.2	-0.7	0.0038068	1.22	22.38	0.81	3.9
247.4	-0.7	0.0038068	1.22	22.31	0.81	3.78
245.7	-0.7	0.0038068	1.22	22.24	0.82	3.67
173.1	-0.6	0.0032672	1.05	20.11	0.9	0.85

## Sheet: Ladislav vein - calcite
	ice	frac.		at Th	at Th	at Th
Th °C	Tm °C	x(NaCl)	w(NaCl) hm%	V (cm3/mol)	ρ (g/cm3)	P (MPa)
215.1	-0.7	0.0038068	1.22	21.2	0.86	2.09
209.6	-0.7	0.0038068	1.22	21.04	0.86	1.88
215.9	-0.7	0.003807	1.22	21.23	0.86	2.13
232.7	-1.1	0.0059514	1.91	21.72	0.84	2.91
226.8	-0.9	0.0048819	1.57	21.55	0.85	2.61
231.5	-0.9	0.0048819	1.57	21.7	0.84	2.85
240.7	-0.9	0.0048819	1.57	22.03	0.83	3.36
237.7	-0.8	0.0043451	1.4	21.93	0.83	3.19
230.5	-0.8	0.0043451	1.4	21.68	0.84	2.8
224	-0.6	0.0032672	1.05	21.49	0.84	2.49
237.4	-0.6	0.0032672	1.05	21.95	0.83	3.18
240.5	-0.8	0.0043451	1.4	22.03	0.83	3.35
198.7	-0.8	0.0043451	1.4	20.73	0.88	1.5
235.4	-0.6	0.0032672	1.05	21.88	0.83	3.07

## Sheet: Ladislav vein - quartz
	ice	frac.		at Th	at Th	at Th
Th °C	Tm °C	x(NaCl)	w(NaCl) hm%	V (cm3/mol)	ρ (g/cm3)	P (MPa)
192.8	-0.5	0.0027261	0.88	20.6	0.88	1.33
181.8	-0.6	0.0032672	1.05	20.32	0.89	1.04
188.8	-0.1	0.000548	0.18	20.52	0.88	1.22
161	-0.1	0.000548	0.18	19.88	0.91	0.63
154.5	-0.5	0.0027261	0.88	19.72	0.92	0.53
157.6	-0.5	0.0027261	0.88	19.78	0.92	0.58
156.2	-0.7	0.0038069	1.22	19.75	0.92	0.56
165.4	-0.6	0.32672	1.05	19.94	0.91	0.7
160	-0.6	0.0032672	1.05	19.83	0.92	0.61
177.8	-0.4	0.0021837	0.71	20.23	0.89	0.95
207.1	-0.9	0.0048819	1.57	20.95	0.87	1.78
159.7	-0.8	0.0043451	1.4	19.81	0.92	0.61
214	-0.3	0.0016398	0.53	21.21	0.85	2.06
168	-0.2	0.0010946	0.35	20.02	0.9	0.75
